# Supplementary material
Source: Springer Nature journal article supplement (https://www.springermedizin.de/resource/supplementary/12943_2009_543_MOESM12_ESM.pdf/9554848)

A

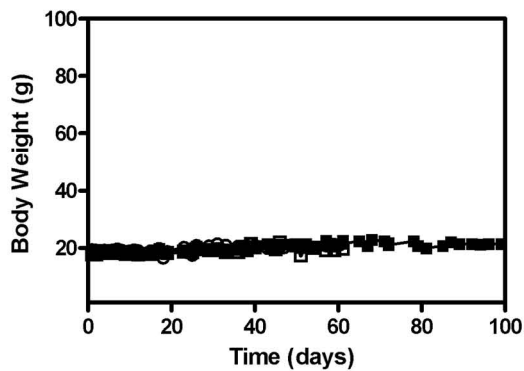

B

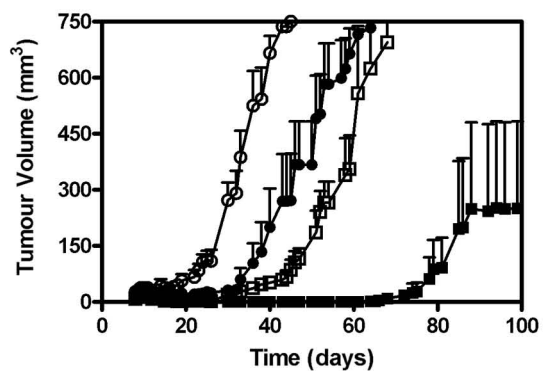

C

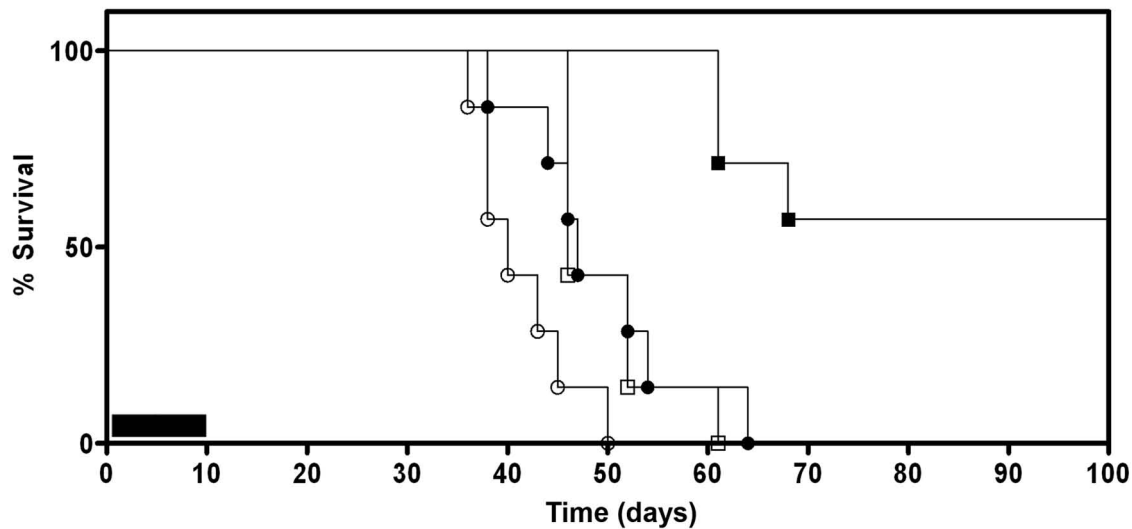

Supplement: MOESM12 [file 9554848]
